# Supplementary material for: Soil Microbial Response to Cover Crop Termination Methods under Two Water Levels
Source: MDPI journal article supplement (doi:10.3390/agronomy12123002), 2022-11-29
Supplement: s1 [file s1]

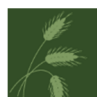

**Table S1.** Set of primers selected from previous studies for the quantification of the major groups of microorganisms in the soil (fungi-ITS, bacteria y archaea -16S rRNA).

| Target Gene       | Primer set name | Sequence (5' to 3')    | Length | Reference |
|-------------------|-----------------|------------------------|--------|-----------|
| Fungal ITS4-ITS5  | ITS5R           | GGAAGTAAAAGTCGTAACAAGG | 651    | [94]      |
|                   | ITS4F           | TCCTCCGTCTATTGATATGC   |        |           |
| Bacteria 16S rRNA | 341 F           | CCTACGGGAGGCAGCAG      | 174    | [95]      |
|                   | 515 R           | ATTCCGCGGCTGGCA        |        |           |
| Archaea 16S rRNA  | Arc771 F        | ACGGTGAGGGATGAAAGCT    | 220    | [96]      |
|                   | Arc 957 R       | CGGCGTTGACTCCAATTG     |        |           |

**Table S2.** Soil microbial variables at maize pre-emergence and 57 days after sowing maize.

| Water Level | Termination Method | Hyphal Length<br>cm g <sup>-1</sup> |         | Total Bacteria<br>Log10 Copies g <sup>-1</sup> |          | Total Fungi<br>Log10 Copies g <sup>-1</sup> |          | Fungi/Bacteria |          | Total Archaea<br>Log10 Copies g <sup>-1</sup> |         |
|-------------|--------------------|-------------------------------------|---------|------------------------------------------------|----------|---------------------------------------------|----------|----------------|----------|-----------------------------------------------|---------|
|             |                    | Pre                                 | 57 DAS  | Pre                                            | 57 DAS   | Pre                                         | 57 DAS   | Pre            | 57 DAS   | Pre                                           | 57 DAS  |
| High        | CON                | 22.3 aA                             | 18.9 aA | 8.89 bA                                        | 9.85 aB  | 6.40 aA                                     | 6.29 aA  | 0.72 aB        | 0.63 aA  | 6.81 aA                                       | 7.37 aB |
|             | INC                | 30.5 aA                             | 33.2 aA | 9.62 dA                                        | 10.58 bB | 6.97cA                                      | 7.15 cA  | 0.72 aB        | 0.67 bA  | 7.54 bA                                       | 8.53 dB |
|             | GLY                | 27.7 aA                             | 20.7 aA | 7.75 aA                                        | 10.34 bB | 6.98 cB                                     | 6.57 bA  | 0.90 cB        | 0.63 aA  | 7.52 bA                                       | 8.48 dB |
|             | RGL                | 20.9 aA                             | 17.6 aA | 8.94 bA                                        | 10.47 bB | 7.44 dB                                     | 6.58 bA  | 0.83 bB        | 0.62 aA  | 7.79 cA                                       | 8.07 bB |
|             | ROL                | 30.0 aA                             | 27.8 aA | 9.25 cA                                        | 10.01 aB | 6.79 bA                                     | 7.09 cB  | 0.73 aA        | 0.70 cA  | 7.77 cA                                       | 8.30 cB |
| Low         | CON                | 11.3 xX                             | 17.4 xX | 8.31 xX                                        | 9.89 xY  | 6.22 wX                                     | 6.35 xX  | 0.74 xY        | 0.64 xX  | 6.74 xX                                       | 7.28 xY |
|             | INC                | 23.0 yX                             | 27.8 xX | 9.12 zX                                        | 10.24 yY | 7.16 yX                                     | 7.14 zX  | 0.78 yY        | 0.69 yzX | 7.54 yX                                       | 8.53 zY |
|             | GLY                | 18.9 xyX                            | 16.7 xX | 8.90 yX                                        | 9.96 xY  | 7.09 yX                                     | 7.15 zX  | 0.79 yY        | 0.71 zX  | 7.68 yX                                       | 7.95 yY |
|             | RGL                | 18.5 xyX                            | 16.2 xX | 9.19 zX                                        | 9.89 xY  | 7.63 zY                                     | 6.89 yX  | 0.83 zY        | 0.69 yX  | 7.69 yX                                       | 7.95 yY |
|             | ROL                | 18.2 xyX                            | 20.4 xX | 9.21 zX                                        | 9.95 xY  | 6.95 xX                                     | 7.05 yzX | 0.75 xY        | 0.70 yzX | 7.73 yX                                       | 8.48 zY |

CON: control, INC: mowing + incorporation, GLY: glyphosate, RGL: glyphosate + roller, ROL: roller crimper; Pre: pre-emergence maize, DAS: days after sowing. For each water level, different lowercase letters indicate significant differences between termination methods, and uppercase letters indicate significant differences between sampling dates (Tukey's HSD test, p-value<0.05).

**Table S3.** AMF colonization, microbial biomass and variables of microbial activity at 57 days after sowing maize.

| Water Level | Termination Method | AMF Colonization | Basal Respiration                                     | Substrate Induced Respiration                         | Microbial Biomass Carbon | qCO <sub>2</sub>     |                        | qMIC                     |
|-------------|--------------------|------------------|-------------------------------------------------------|-------------------------------------------------------|--------------------------|----------------------|------------------------|--------------------------|
|             |                    | %                | mg C-CO <sub>2</sub> kg <sup>-1</sup> h <sup>-1</sup> | mg C-CO <sub>2</sub> kg <sup>-1</sup> h <sup>-1</sup> | mg kg <sup>-1</sup>      | mg C-CO <sub>2</sub> | mg MBC h <sup>-1</sup> | mg MBC g <sup>-1</sup> C |
| High        | CON                | 10.0 a           | 0.63 ab                                               | 1.73 a                                                | 40.40 a                  | 0.02 b               |                        | 8.54 a                   |
|             | INC                | 28.0 b           | 0.94 b                                                | 1.15 a                                                | 88.74 b                  | 0.01 ab              |                        | 17.46 b                  |
|             | GLY                | 20.6 ab          | 0.64 ab                                               | 1.65 a                                                | 63.68 ab                 | 0.01 ab              |                        | 12.51 ab                 |
|             | RGL                | 20.0 ab          | 0.51a                                                 | 0.92 a                                                | 56.84 ab                 | 0.00 a               |                        | 10.78 ab                 |
|             | ROL                | 29.1 b           | 0.70 ab                                               | 1.69 a                                                | 81.00 ab                 | 0.01 ab              |                        | 16.34 ab                 |
| Low         | CON                | 11.6 x           | 0.64 x                                                | 1.30 x                                                | 44.82 x                  | 0.01 x               |                        | 9.02 x                   |
|             | INC                | 25.2 x           | 0.58 x                                                | 0.70 x                                                | 48.87 x                  | 0.01 x               |                        | 9.47 x                   |
|             | GLY                | 11.4 x           | 0.77 x                                                | 1.69 x                                                | 66.40 x                  | 0.01 x               |                        | 13.44 x                  |
|             | RGL                | 13.2 x           | 0.60 x                                                | 1.72 x                                                | 78.05 x                  | 0.00 x               |                        | 16.44 x                  |
|             | ROL                | 15.2 x           | 0.82 x                                                | 1.38 x                                                | 64.83 x                  | 0.01 x               |                        | 13.33 x                  |

CON: control, INC: mowing + incorporation, GLY: glyphosate, RGL: glyphosate + roller, ROL: roller crimper; AMF: arbuscular mycorrhizal fungi, qCO<sub>2</sub>: metabolic quotient, qMIC: microbial quotient. For each water level, different letters indicate significant differences between means (Tukey's HSD test, p-value<0.05).

**Table S4.** Soil physicochemical variables at 57 days after sowing maize.

| Water Level | Termination Method | pH <sub>1:2.5</sub> | EC <sub>1:2.5</sub>   | TOC                | DOC                 | DOC/TOC | C/N     | C/P    | N/P      | Moisture | T                  | PR                  | Db                 |
|-------------|--------------------|---------------------|-----------------------|--------------------|---------------------|---------|---------|--------|----------|----------|--------------------|---------------------|--------------------|
|             |                    |                     | $\mu\text{S cm}^{-1}$ | $\text{g kg}^{-1}$ | $\text{mg kg}^{-1}$ | %       |         |        |          | %v       | $^{\circ}\text{C}$ | $\text{kg cm}^{-2}$ | $\text{g cm}^{-3}$ |
| High        | CON                | 8.34 a              | 250 b                 | 4.88 a             | 57.8 a              | 1.18 a  | 10.08 a | 0.17 a | 0.020 a  | 7.46 ab  | 24.6 a             | 1.76 bc             | 1.33 a             |
|             | INC                | 8.47 a              | 189 ab                | 5.07 a             | 58.8 a              | 1.16 a  | 6.72 a  | 0.18 a | 0.028 ab | 6.32 a   | 23.9 a             | 2.22 c              | 1.33 a             |
|             | GLY                | 8.54 a              | 171 ab                | 5.13 a             | 54.7 a              | 1.07 a  | 6.84 a  | 0.24 a | 0.036 b  | 10.27 ab | 24.5 a             | 1.30 ab             | 1.36 a             |
|             | RGL                | 8.47 a              | 200 ab                | 5.25 a             | 55.8 a              | 1.07 a  | 9.06 a  | 0.18 a | 0.021 a  | 12.20 b  | 23.1 a             | 1.12 a              | 1.35 a             |
|             | ROL                | 8.46 a              | 139 a                 | 4.99 a             | 51.7 a              | 1.04 a  | 7.18 a  | 0.19 a | 0.027 ab | 7.99 ab  | 23.8 a             | 1.60 abc            | 1.36 a             |
| Low         | CON                | 8.35 x              | 238 y                 | 4.93 x             | 58.4 x              | 1.19 x  | 6.19 x  | 0.15 x | 0.025 x  | 2.78 x   | 24.9 x             | 1.88 x              | 1.27 x             |
|             | INC                | 8.42 x              | 187 xy                | 5.10 x             | 53.9 x              | 1.07 x  | 11.76 x | 0.18 x | 0.018 x  | 3.02 x   | 24.6 x             | 2.05 x              | 1.31 x             |
|             | GLY                | 8.35 x              | 212 xy                | 5.02 x             | 54.5 x              | 1.09 x  | 7.71 x  | 0.17 x | 0.024 x  | 3.14 x   | 25.1 x             | 1.48 x              | 1.37 x             |
|             | RGL                | 8.35 x              | 235 y                 | 4.86 x             | 53.5 x              | 1.12 x  | 7.02 x  | 0.15 x | 0.023 x  | 3.20 x   | 24.2 x             | 1.62 x              | 1.31 x             |
|             | ROL                | 8.40 x              | 147 x                 | 5.00 x             | 56.1 x              | 1.14 x  | 6.28 x  | 0.17 x | 0.028 x  | 3.16 x   | 24.0 x             | 1.90 x              | 1.34 x             |

CON: control, INC: mowing + incorporation, GLY: glyphosate, RGL: glyphosate + roller, ROL: roller crimper; EC: electrical conductivity at 25°C, TOC: total organic carbon, DOC: dissolved organic carbon, C/N: carbon/nitrogen ratio, C/P: carbon/phosphorus ratio, T: soil temperature, PR: penetration resistance, Db: bulk density. For each water level, different letters indicate significant differences between means (Tukey's HSD test, p-value <0.05).

**Table S5.** Pearson correlation matrix of soil physicochemical and soil microbial variables.

|                  | AMF col. | Hyphal length | Basal resp. | SIR     | MBC       | qCO <sub>2</sub> | qMIC      | Total bacteria | Total fungi | Fungi/Bacteria | Total archaea |
|------------------|----------|---------------|-------------|---------|-----------|------------------|-----------|----------------|-------------|----------------|---------------|
| AMF col.         |          | 0.37 **       | 0.05        | -0.10   | 0.33 *    | -0.31 *          | 0.27 *    | 0.51 ***       | 0.42 **     | 0.15           | 0.53 ***      |
| Hyphal length    | 0.37 **  |               | 0.17        | -0.10   | 0.34 **   | -0.23            | 0.3 *     | 0.32 *         | 0.31 **     | 0.13           | 0.37 **       |
| Basal resp.      | 0.05     | 0.17          |             | 0.00    | 0.31 *    | 0.34 **          | 0.32 *    | 0.00           | 0.25        | 0.24           | 0.16          |
| SIR              | -0.10    | -0.10         | 0.00        |         | -0.00     | 0.24             | 0.02      | -0.26          | -0.08       | 0.05           | -0.14         |
| MBC              | 0.33 *   | 0.34 **       | 0.31 *      | -0.00   |           | -0.58 ***        | 0.97 ***  | 0.22           | 0.45 ***    | 0.33 *         | 0.38 **       |
| qCO <sub>2</sub> | -0.31 *  | -0.23         | 0.34 **     | 0.24    | -0.58 *** |                  | -0.55 *** | -0.27 *        | -0.28 *     | -0.14          | -0.32 *       |
| qMIC             | 0.27 *   | 0.3 *         | 0.32 *      | 0.02    | 0.97 ***  | -0.55 ***        |           | 0.15           | 0.42 **     | 0.34 **        | 0.33 *        |
| Total bacteria   | 0.51 *** | 0.32 *        | 0.00        | -0.26   | 0.22      | -0.27 *          | 0.15      |                | 0.25        | -0.27          | 0.57 ***      |
| Total fungi      | 0.42 **  | 0.31 *        | 0.25        | -0.08   | 0.45 ***  | -0.28 *          | 0.42 **   | 0.25           |             | 0.86 ***       | 0.72 ***      |
| Fungi/bacteria   | 0.15     | 0.13          | 0.24        | 0.05    | 0.33 *    | -0.14            | 0.34 **   | -0.27          | 0.86 ***    |                | 0.41 **       |
| Total archaea    | 0.53 *** | 0.37 **       | 0.16        | -0.14   | 0.38 **   | -0.32 *          | 0.33 *    | 0.575 ***      | 0.72 ***    | 0.41 **        |               |
| PR               | 0.04     | 0.14          | 0.31 *      | -0.28 * | 0.03      | 0.22             | 0.05      | 0.04           | 0.20        | 0.17           | 0.05          |
| Db               | 0.08     | 0.10          | 0.03        | -0.10   | 0.21      | -0.27            | 0.20      | 0.10           | 0.11        | 0.05           | 0.16          |
| TOC              | 0.11     | 0.02          | -0.06       | 0.01    | -0.04     | 0.00             | -0.26     | 0.22           | 0.08        | -0.03          | 0.13          |
| pH               | 0.03     | 0.30 *        | 0.06        | -0.14   | 0.20      | -0.21            | 0.21      | 0.39 **        | 0.11        | -0.09          | 0.37 **       |
| EC               | -0.19    | -0.22         | -0.26       | 0.02    | -0.09     | 0.01             | -0.09     | -0.19          | -0.36 **    | -0.25          | -0.53 ***     |
| C/N              | 0.03     | 0.15          | -0.15       | -0.00   | -0.03     | 0.09             | -0.08     | 0.06           | 0.05        | 0.02           | -0.03         |
| DOC              | -0.01    | -0.09         | 0.25        | 0.19    | -0.33 *   | 0.59 ***         | -0.31 *   | 0.02           | -0.17       | -0.18          | -0.14         |
| C/P              | 0.35 **  | 0.19          | -0.18       | 0.06    | 0.09      | -0.26            | -0.02     | 0.37 **        | 0.07        | -0.11          | 0.31 *        |
| N/P              | 0.22     | -0.05         | 0.03        | 0.06    | 0.031     | -0.19            | 0.00      | 0.13           | -0.00       | -0.06          | 0.22          |
| DOC/TOC          | -0.08    | -0.08         | 0.22        | 0.15    | -0.23     | 0.44 ***         | -0.09     | -0.11          | -0.16       | -0.10          | -0.17         |
| Moisture         | 0.26     | 0.07          | -0.26       | 0.01    | -0.01     | -0.17            | -0.05     | 0.47 ***       | -0.31 *     | -0.56 ***      | 0.07          |
| Temperature      | -0.10    | 0.08          | -0.01       | 0.00    | 0.01      | 0.00             | -0.01     | -0.27 *        | -0.03       | 0.10           | -0.16         |

AMF col.: AMF colonization, Basal resp.: basal respiration, SIR: substrate induced respiration, MBC: microbial biomass carbon, qCO<sub>2</sub>: metabolic quotient, qMIC: microbial quotient, PR: penetration resistance, Db: density bulk, TOC: total organic carbon, EC: electrical conductivity at 25°C, C/N: carbon/nitrogen ratio, DOC: dissolved organic carbon, C/P: carbon/phosphorus ratio, N/P: nitrogen/phosphorus ratio. ns: not significant; \*, p < 0.05; \*\*, p < 0.01; \*\*\*, p < 0.001.

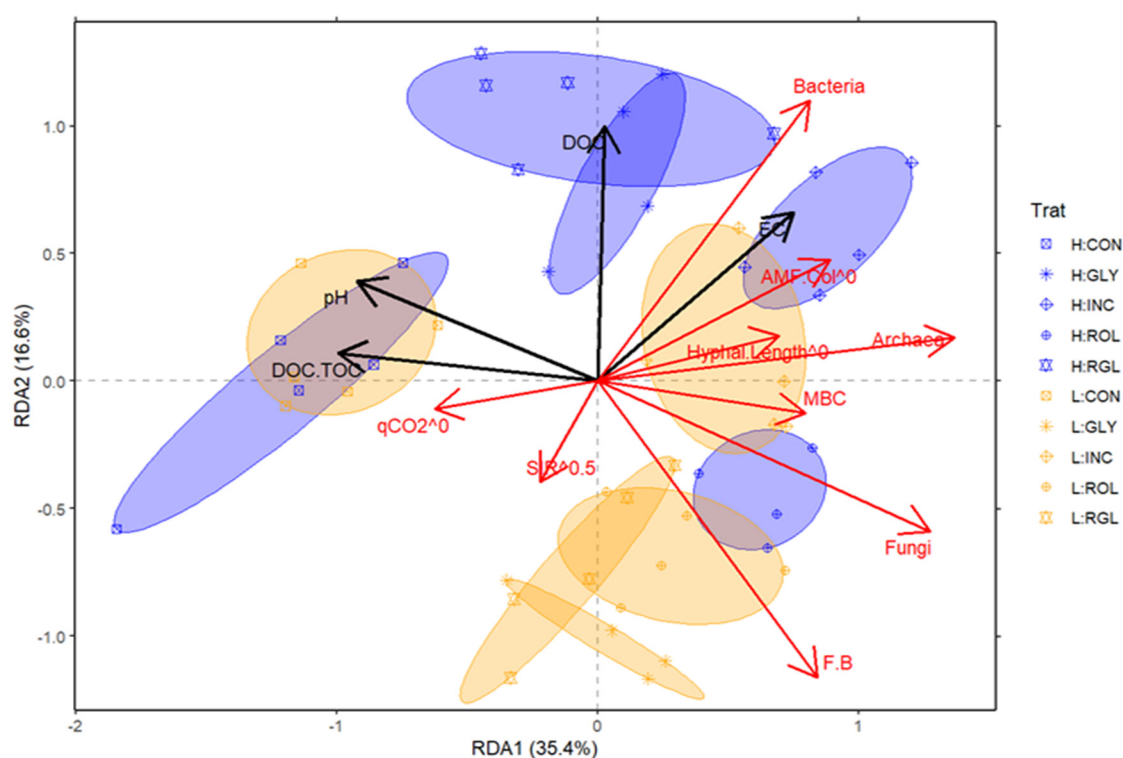

**Figure S1.** Redundancy Analysis (RDA) results for soil microbial variables, soil properties and ten combined treatments of termination methods and water levels. CON: control, INC: mowing + incorporation, GLY: glyphosate, RGL: glyphosate + roller, ROL: roller crimper; H: high water level, L: low water level; thin red arrows represent microbial response variables;  $qCO_2^0$ : metabolic quotient,  $SIR^{0.5}$ : substrate-induced respiration, Col: AMF colonisation, MBC: microbial biomass carbon; thick black arrows represent soil explanatory variables; EC: electrical conductivity at 25°C, DOC: dissolved organic carbon, DOC.TOC: dissolved to total organic carbon.
